# Supplementary material for: Single particle ICP-MS: a tool for the characterization of gold nanoparticles in nanotheranostics applications
Source: Royal Society of Chemistry journal article supplement (doi:10.1039/d4ja00141a), 2024-01-01

| Acquisition mode               | Mean Intensity (counts) |       |
|--------------------------------|-------------------------|-------|
|                                | Q3 Only                 | MS/MS |
| AuNP signal<br>(50 nm)         | 266.26                  | 59.46 |
| Dissolved gold signal (2 ug/L) | 8.74                    | 2.77  |

---

Table S1. ICP-MS acquisition mode optimization

---

Figure S1: Dwell time optimization from 20 to 1000  $\mu\text{s}$

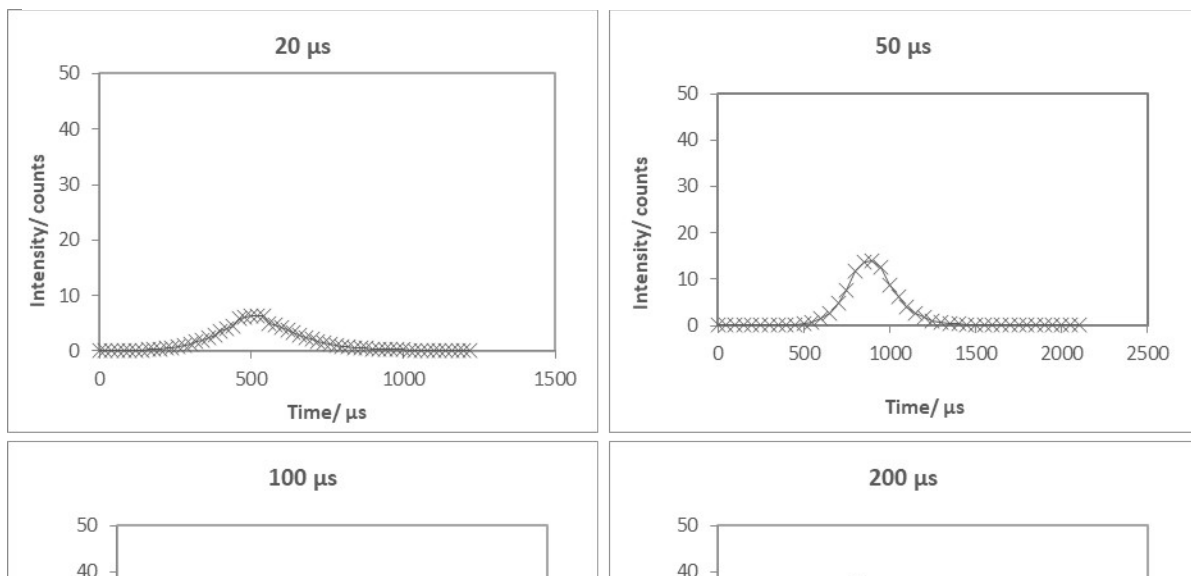

Supplement: d4ja00141a1.pdf [file d4ja00141a1.pdf]
